# Supplementary material for: Chemical vapor deposition-assisted fabrication of a graphene-wrapped MnO/carbon nanofibers membrane as a high-rate and long-life anode for lithium ion batteries
Source: Royal Society of Chemistry journal article supplement (doi:10.1039/c7ra09942h), 2017-01-01
Supplement: c7ra09942h1.pdf [file c7ra09942h1.pdf]

## Electronic Supplementary Materials

### **Chemical Vapor Deposition-Assisted Fabrication of Graphene-wrapped MnO/Carbon Nanofibers Membrane as High-rate and Long-Life Anode for Lithium Ion Batteries**

Juan Wang<sup>1,2</sup>, Chao Li<sup>2</sup>, Deliang Chen<sup>2</sup>, Zhenyu Yang<sup>1,2,\*</sup>

<sup>1</sup>School of Chemical Engineering and Energy Technology, Dongguan University of  
Technology, Dongguan, Guangdong, 523808, P. R. China

<sup>2</sup>School of Chemistry, Nanchang University, No.999, Xuefu Road, Nanchang, Jiangxi,  
China.

*\*Correspondence to be addressed to Z.Y. (zyyang@ncu.edu.cn)*

---

<sup>\*</sup>, Corresponding Authors. Phone: +86-131-77812780; E-mail: [zyyang@ncu.edu.cn](mailto:zyyang@ncu.edu.cn)

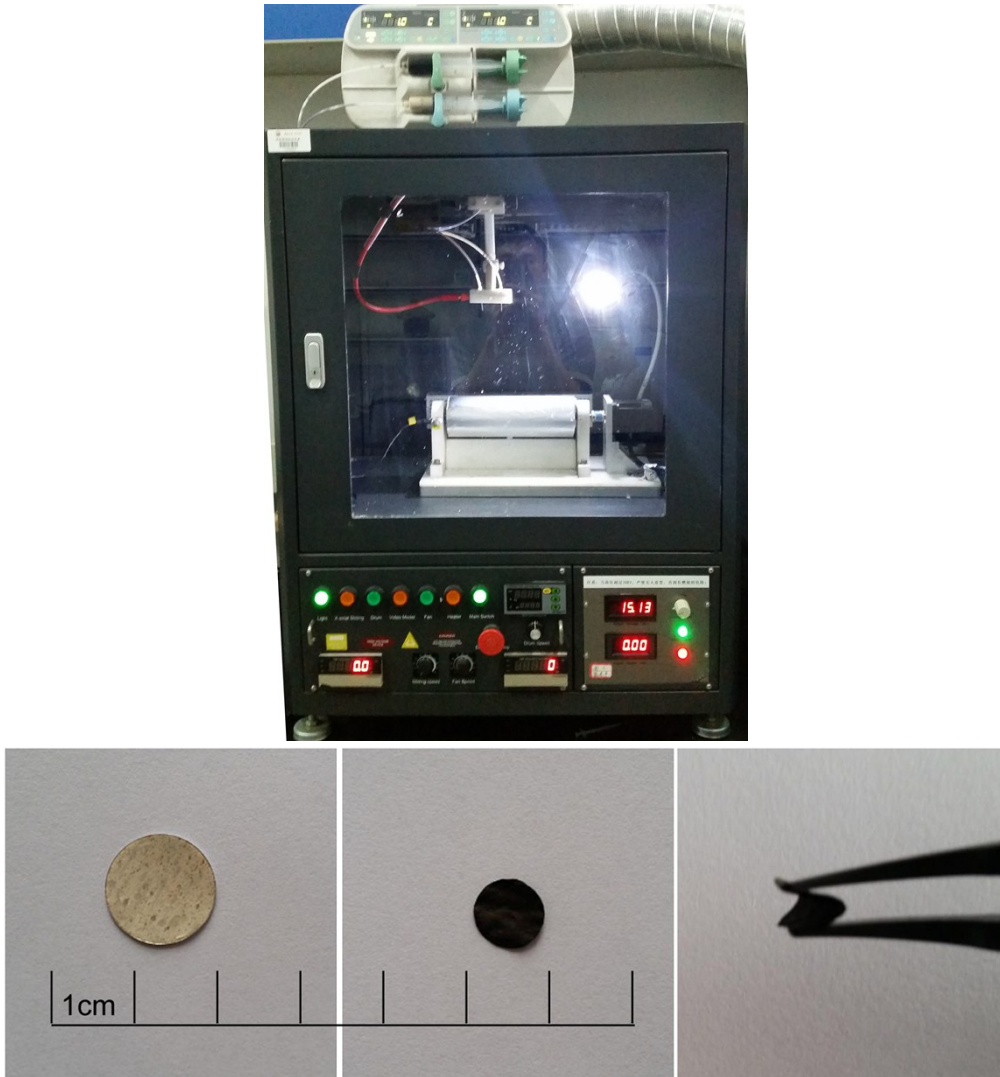

**Figure S1: Picture of the pictures of electrospinning equipment and the MnO/CNFs@G composite membrane before (a) and after (b) CVD process, and the picture of the bent state (c)**

.

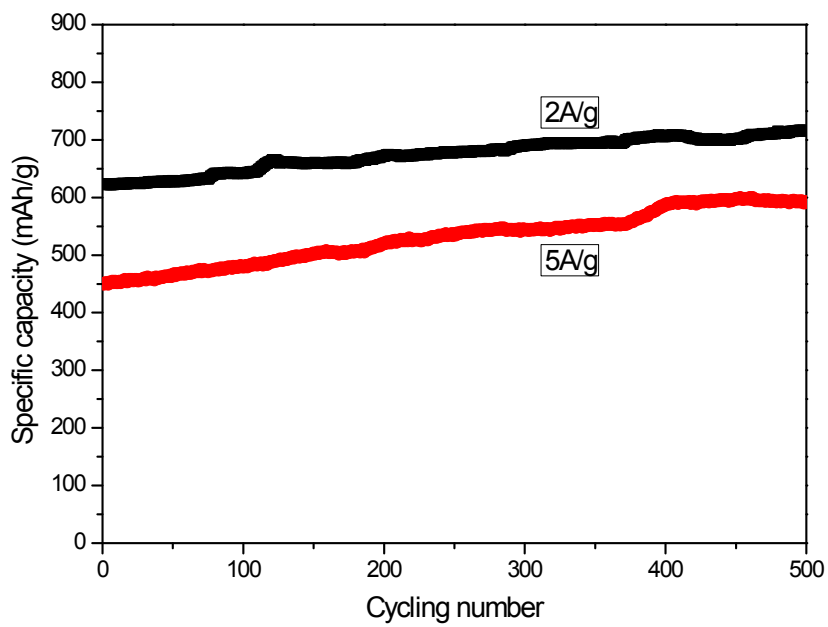

**Figure S2: Cycling performance of MnO/CNFs@G composite membrane electrode at current densities of 2A/g and 5A/g.**

**Table S1.** Comparison of electrochemical performance of various MnO/C composites.

| Products                     | reversible capacity<br>0.1 A g <sup>-1</sup><br>(mAh g <sup>-1</sup> ) | Rating<br>Performance<br>(mAh g <sup>-1</sup> ) /<br>(A g <sup>-1</sup> ) | Cycling Performance<br>Residual capacity<br>(mAh g <sup>-1</sup> )/<br>(A g <sup>-1</sup> )/Cycle number | Reference |
|------------------------------|------------------------------------------------------------------------|---------------------------------------------------------------------------|----------------------------------------------------------------------------------------------------------|-----------|
| Graphite/MnO<br>@C/rGO       | ~1165.3                                                                | ~504.4/4                                                                  | 471.3 /4/4000 <sup>th</sup> cycle                                                                        | 13        |
| C/MnO@rGO<br>nanofibers      | ~832.7                                                                 | ~285.1/2.5                                                                | 815.3 /0.1/200 <sup>th</sup> cycle                                                                       | 14        |
| MnO-C/N webs                 | -                                                                      | ~386/10                                                                   | 1268 /1/700 <sup>th</sup> cycle                                                                          | 15        |
| C/MnO<br>nanofibers          | ~918                                                                   | ~406.1/3                                                                  | 655 /0.5/280 <sup>th</sup> cycle                                                                         | 16        |
| MnO-C/N<br>nanotubes         | ~1171                                                                  | ~450.2/5                                                                  | 804.3/1/100 <sup>th</sup> cycle                                                                          | 26        |
| MnO/C<br>microspheres        | ~842                                                                   | ~588/2                                                                    | 937 /1/300 <sup>th</sup> cycle                                                                           | 28        |
| Porous MnO/C<br>microspheres | ~755.6                                                                 | ~234.7/3                                                                  | 702.2 /0.1/50 <sup>th</sup> cycle                                                                        | 19        |
| MnO/CNFs@G                   | ~946                                                                   | ~452/5                                                                    | 426 /10/5000 <sup>th</sup> cycle                                                                         | This work |
